# Supplementary material for: Comparison of Various Extraction Approaches for Optimized Preparation of Intracellular Metabolites from Human Mesenchymal Stem Cells and Fibroblasts for NMR-Based Study
Source: MDPI journal article supplement (doi:10.3390/metabo14050268), 2024-05-07
Supplement: s1 [file s1]

# **Comparison of various extraction approaches for optimized preparation of intracellular metabolites from human mesenchymal stem cells and fibroblasts for NMR-based study.**

*Slavomíra Nováková<sup>1</sup>, Eva Baranovičová<sup>1\*</sup>, Zuzana Hatoková<sup>1</sup>, Gábor Beke<sup>2</sup>, Janka Pálešová<sup>1</sup>, Romana Záhumenská<sup>1</sup>, Bibiána Baďurová<sup>1</sup>, Mária Janíčková<sup>3</sup>, Ján Strnádel<sup>1</sup>, Erika Halašová<sup>1</sup>, Eva Baranovičová<sup>1\*</sup>, Henrieta Škovierová<sup>1</sup>*

<sup>1</sup>Biomedical Centre Martin, Jessenius Faculty of Medicine in Martin, Comenius University in Bratislava (JFM CU), Malá Hora 4C, 036 01 Martin, Slovakia.

<sup>2</sup>Institute of Molecular Biology, Slovak Academy of Sciences, Dúbravská cesta 21, 845 51 Bratislava, Slovakia

<sup>3</sup>Department of Stomatology and Maxillofacial Surgery, University Hospital in Martin and JFM CU, Kollárova

Author for correspondence: [eva.baranovicova@uniba.sk](mailto:eva.baranovicova@uniba.sk), Tel.: + 421432633495

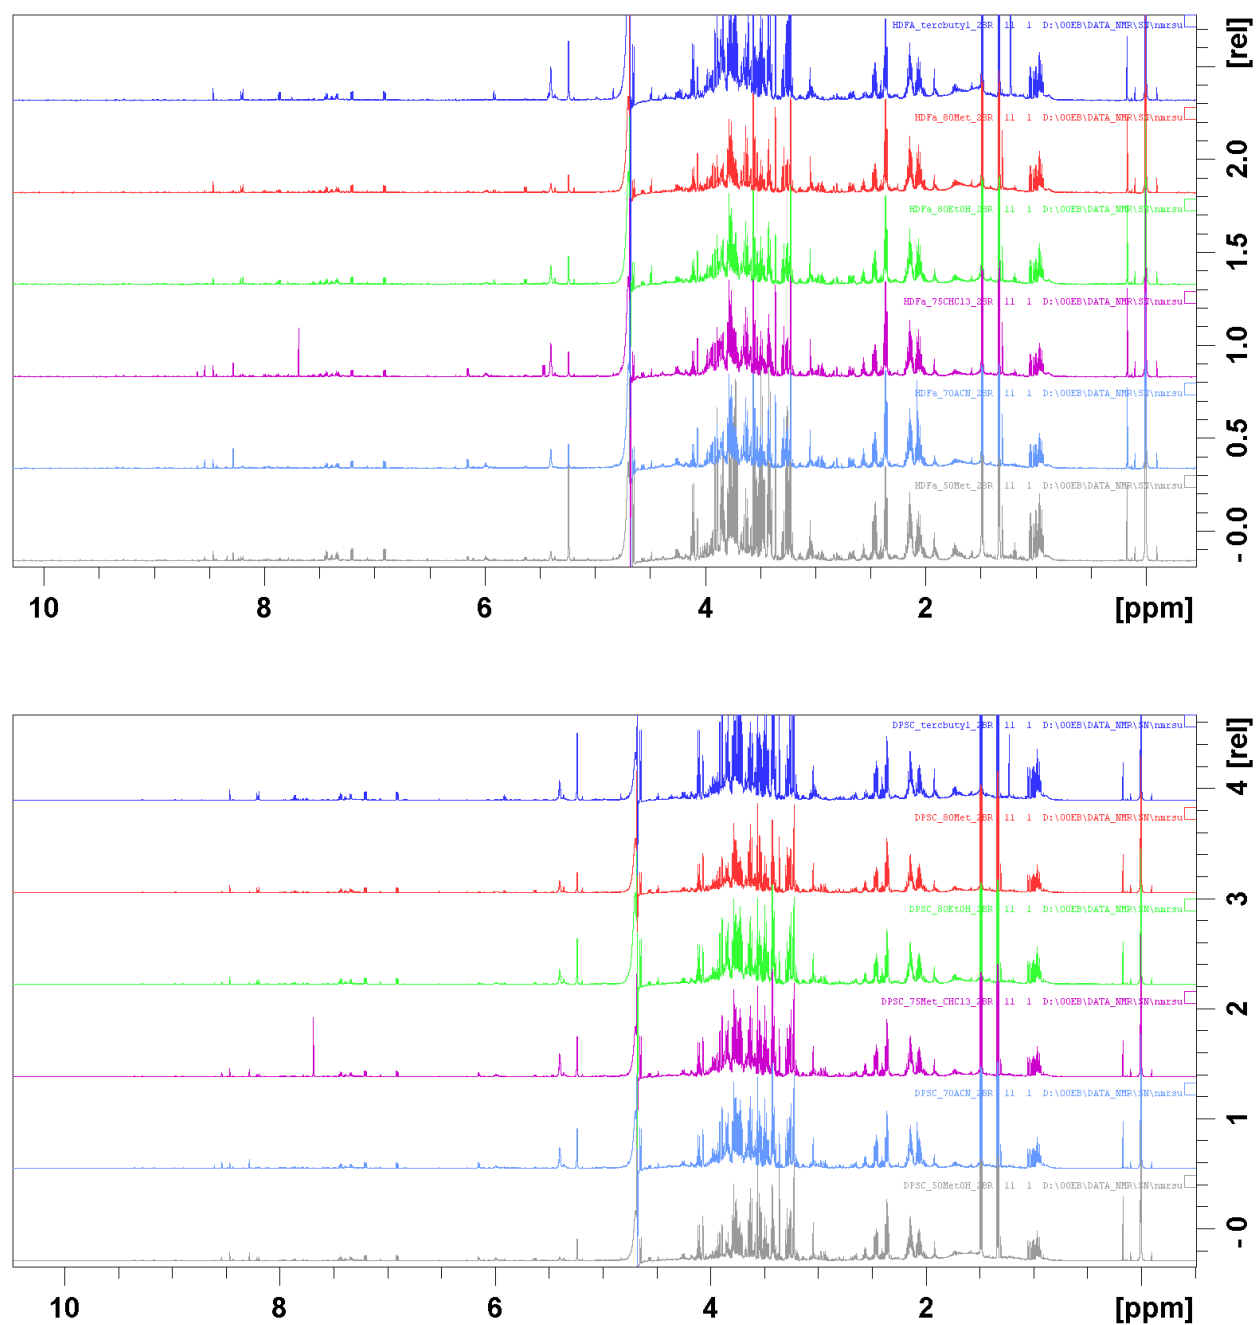

Figure : NMR spectra from the 2nd biological replica, different extraction methods, from up to down: MTBE, 80% MetOH, 80% EtOH, 75%MetOH + 25% CHCl<sub>3</sub>, 70% ACN, 50% MetOH, above – HDFA, below – DPSC cells

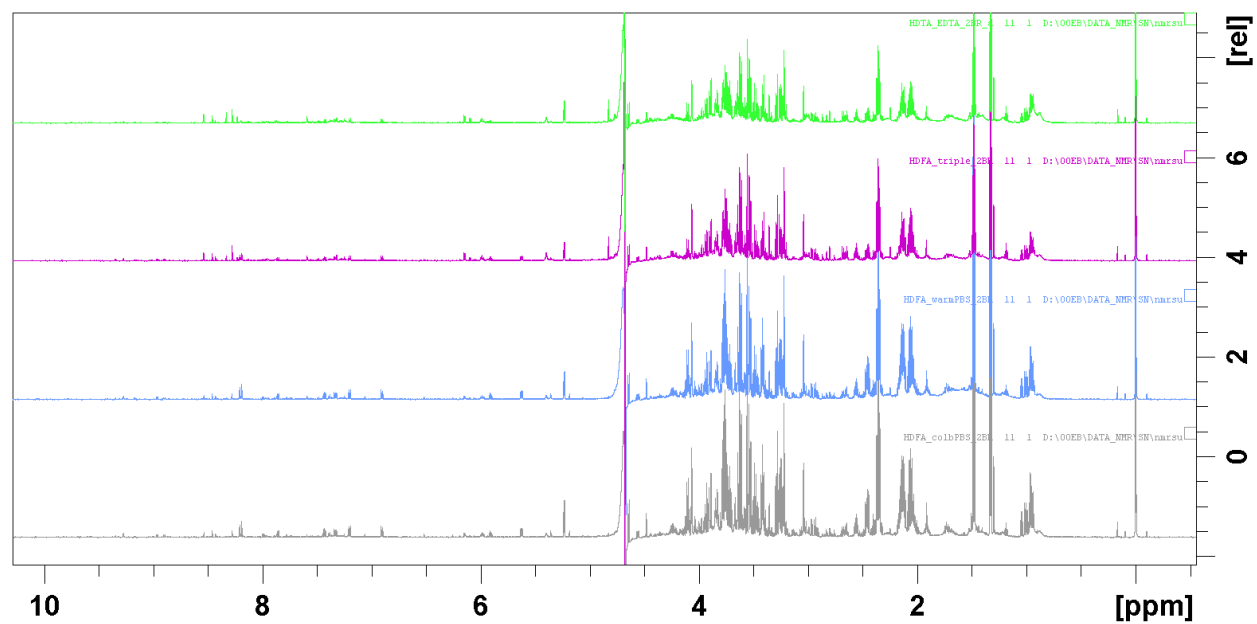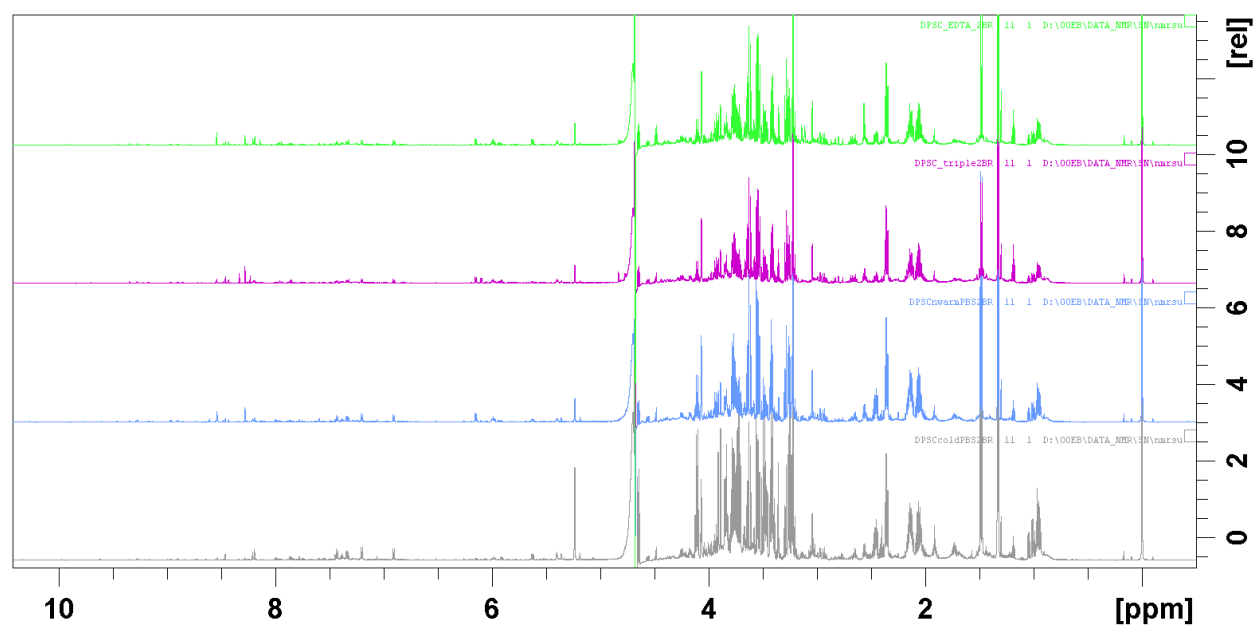

Figure : NMR spectra from the 2nd biological replica, different harvesting methods, from up to down: Trypsin-EDTA, TrypLE, warm PBS, cold PBS, above – HDFA, below – DPSC cells
