# Supplementary material for: Comparison of Various Extraction Approaches for Optimized Preparation of Intracellular Metabolites from Human Mesenchymal Stem Cells and Fibroblasts for NMR-Based Study
Source: MDPI journal article supplement (doi:10.3390/metabo14050268), 2024-05-07

# **Comparison of various extraction approaches for optimized preparation of intracellular metabolites from human mesenchymal stem cells and fibroblasts for NMR-based study.**

*Slavomíra Nováková<sup>1</sup>, Zuzana Hatoková<sup>1</sup>, Gábor Beke<sup>2</sup>, Janka Pálešová<sup>1</sup>, Romana Záhumenská<sup>1</sup>, Bibiána Baďurová<sup>1</sup>, Mária Janíčková<sup>3</sup>, Ján Strnádel<sup>1</sup>, Erika Halašová<sup>1</sup>, Eva Baranovičová<sup>1\*</sup>, Henrieta Škovierová<sup>1</sup>*

<sup>1</sup>Biomedical Centre Martin, Jessenius Faculty of Medicine in Martin, Comenius University in Bratislava (JFM CU), Malá Hora 4C, 036 01 Martin, Slovakia.

<sup>2</sup>Institute of Molecular Biology, Slovak Academy of Sciences, Dúbravská cesta 21, 845 51 Bratislava, Slovakia

<sup>3</sup>Department of Stomatology and Maxillofacial Surgery, University Hospital in Martin and JFM CU, Kollárova

Author for correspondence: [eva.baranovicova@uniba.sk](mailto:eva.baranovicova@uniba.sk), Tel.: + 421432633495

## **Table of content**

Supplementary figure S1. Morphology of DPSCs and HDFa cells at four days after incubation when they were applied in experiments , which were targeted to effect of harvesting (A) or extraction (B) methods. Magnification 100 x

### A/. Effect of harvesting method

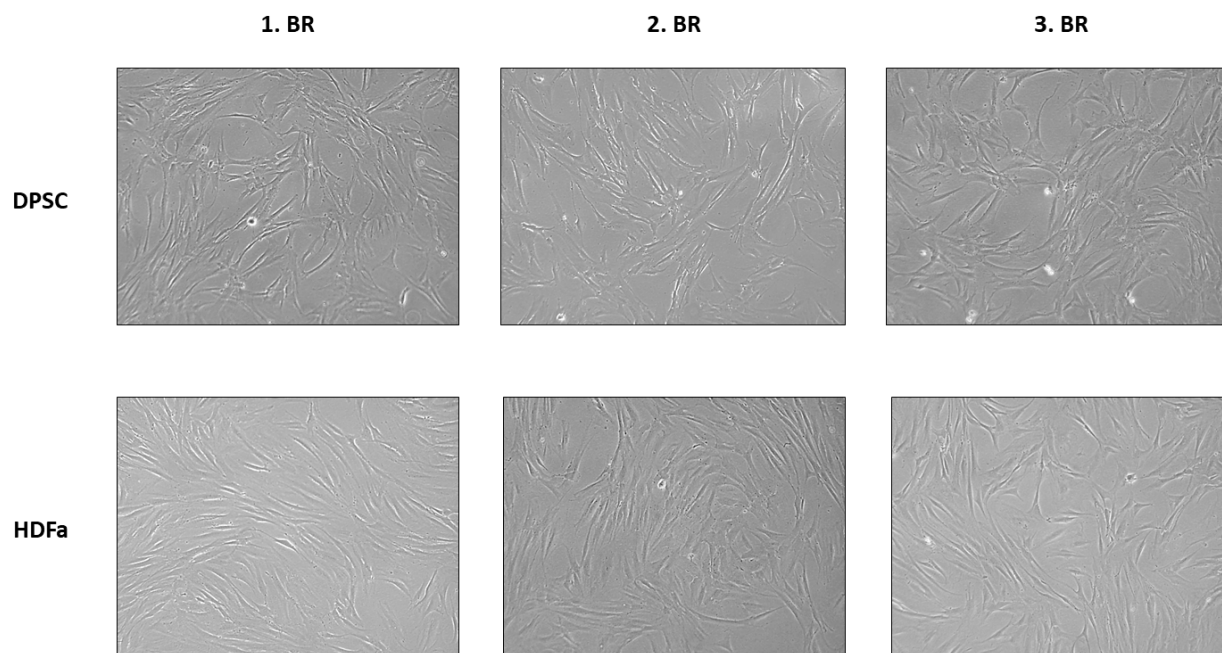

### B/. Effect of extraction method

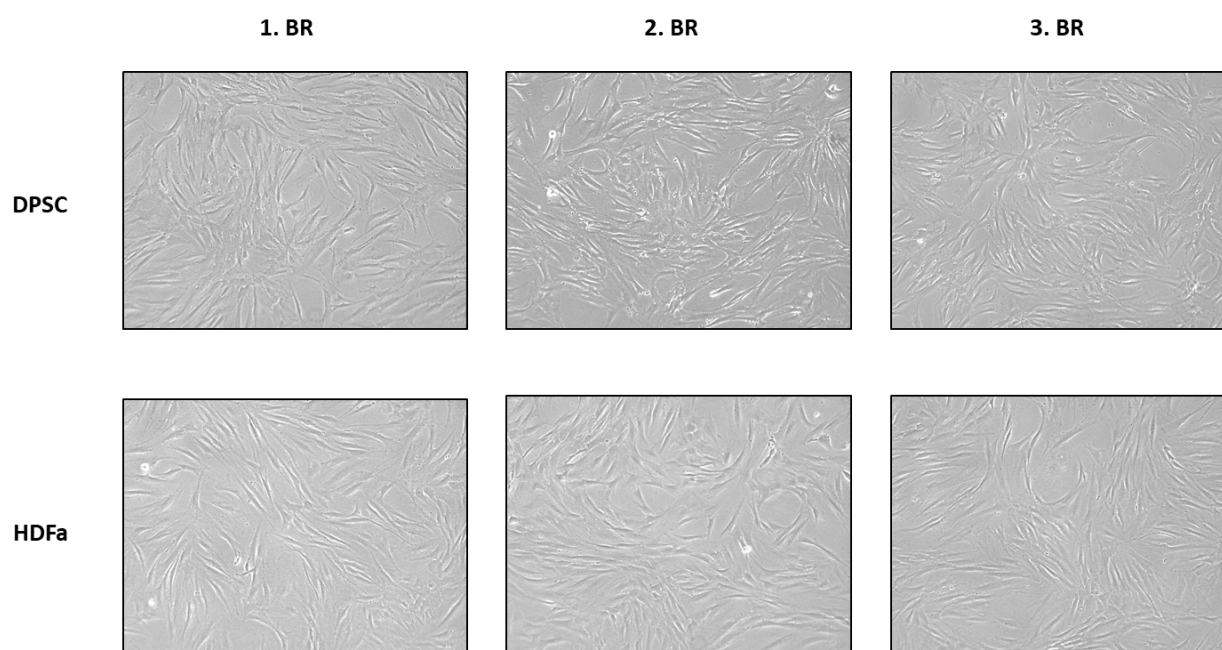

Supplement: s1 [file s1]
